# Supplementary material for: Distribution of Mobile Health Applications amongst Patients with Symptomatic Peripheral Arterial Disease in Germany: A Cross-Sectional Survey Study
Source: MDPI journal article supplement (doi:10.3390/jcm11030498), 2022-01-19
Supplement: s1 [file s1]

## Electronic Supplement

Table S1: Survey items and answering options

|    |                                                                                                                                              |                                                                                                                                                                                          |
|----|----------------------------------------------------------------------------------------------------------------------------------------------|------------------------------------------------------------------------------------------------------------------------------------------------------------------------------------------|
| 1  | <b>Gender identity</b>                                                                                                                       | Men, women, diverse                                                                                                                                                                      |
| 2  | <b>Age</b>                                                                                                                                   | In years                                                                                                                                                                                 |
| 3  | <b>Peripheral arterial disease diagnosed (known) since</b>                                                                                   | In years                                                                                                                                                                                 |
| 4  | <b>Chronic limb-threatening ischaemia (wound healing disorders, diabetic foot ulcers)</b>                                                    | Yes, no                                                                                                                                                                                  |
| 5  | <b>What is your highest education degree?</b>                                                                                                | Prefer not to say, no associate degree, final apprenticeship examination, technical college degree diploma, bachelor's degree or similar, master's degree or similar, promotion (thesis) |
| 6  | <b>What is your main living region?</b>                                                                                                      | Rural, intermediate, urban                                                                                                                                                               |
| 7  | <b>What is your preferred source of health-related information?</b>                                                                          | Television, internet, newspaper, radio, other                                                                                                                                            |
| 8  | <b>Have you changed your health behaviour since you were informed about the diagnosis peripheral arterial disease?</b>                       | Yes, no                                                                                                                                                                                  |
| 9  | <b>Do you own a smartphone?</b>                                                                                                              | Yes, no                                                                                                                                                                                  |
| 10 | <b>If yes: Do you use mobile applications ("apps")?</b>                                                                                      | Yes, no                                                                                                                                                                                  |
| 11 | <b>Have you ever used health-related digital and mobile applications ("mHealth")?</b>                                                        | Yes, no                                                                                                                                                                                  |
| 12 | <b>Do you need regular user support (assistance) to use your smartphone?</b>                                                                 | Yes, no                                                                                                                                                                                  |
| 13 | <b>Do you own a wearable (e.g., smartwatch, heart rate monitor, pedometer)?</b>                                                              | Yes, no                                                                                                                                                                                  |
| 14 | <b>What is your opinion: Could mHealth and technologies which observe and process your behaviour help to improve your healthy lifestyle?</b> | Yes, maybe, no                                                                                                                                                                           |
| 15 | <b>Do you know the reason for each of your medical prescriptions?</b>                                                                        | Yes, maybe, no                                                                                                                                                                           |

Table S2: Comparison of baseline characteristics between 12 university institutions, one non-academic institution, and an outpatient cohort. CI: Confidence interval. OPT: Optimal pharmacological treatment.

|                                                                    | <b>GermanVasc<br/>Kotov et al.<br/>2021</b> | <b>BARMER<br/>Claims<br/>Peters et<br/>al. 2020</b> | <b>University<br/>institutions</b> | <b>Non-academic<br/>institution</b> | <b>Outpatient<br/>facility</b> |
|--------------------------------------------------------------------|---------------------------------------------|-----------------------------------------------------|------------------------------------|-------------------------------------|--------------------------------|
| <b>Number of<br/>patients</b>                                      | 5608                                        | 83867                                               | 298                                | 28                                  | 47                             |
| <b>Female sex, %<br/>(95% CI)</b>                                  | 34.0%                                       | 45.8%                                               | 28.9 (23.7-<br>34.5)               | 33.3 (16.5-<br>54.0)                | 42.6 (28.3-57.8)               |
| <b>Median age, years<br/>(interquartile<br/>range)</b>             | 69                                          | 71.9                                                | 70 (62-78)                         | 69.5 (64.5-<br>79.75)               | 74 (68-80)                     |
| <b>Chronic limb-<br/>threatening<br/>ischaemia, %<br/>(95% CI)</b> | 29.9%                                       | 46%                                                 | 65.3 (59.4-<br>71.0)               | 73.1 (52.2-<br>88.4)                | 45.7 (30.9-61.0)               |
| <b>Smartphone<br/>use, % (95% CI)</b>                              | NA                                          | NA                                                  | 67.0 (61.3-<br>72.4)               | 64.3 (44.1-<br>81.4)                | 57.4 (42.2-71.7)               |
